# Supplementary material
Source: MDPI journal article supplement (https://www.mdpi.com/2673-4117/4/1/38)
Supplement: s1 [file s1]

## Supporting information

# Prediction Model for Optimal Efficiency of the Green Corrosion Inhibitor Oleoylsarcosine: Optimization by Statistical Testing of the Relevant Influencing Factors

Saad E. Kaskah <sup>1,2,\*</sup>, Gitta Ehrenhaft <sup>3</sup>, Jörg Gollnick <sup>3</sup> and Christian B. Fischer <sup>1,4,\*</sup>

<sup>1</sup> Department of Physics, University of Koblenz, 56070 Koblenz, Germany

<sup>2</sup> General Directorate of Industrial Development, Ministry of Industry and Minerals, Baghdad 22017, Iraq

<sup>3</sup> Institute of Mechanics and Material Science, TH Mittelhessen University of Applied Sciences, 35390 Giessen, Germany

<sup>4</sup> Materials Science, Energy and Nano-Engineering Department, Mohammed VI Polytechnic University, Ben Guerir 43150, Morocco

\* Correspondence: ; saadelias82@gmail.com (S.E.K.); chrbfischer@uni-koblenz.de (C.B.F.); Tel.: +964-7726095804 (S.E.K.); +49-2612872345 (C.B.F.)

## List of contents

|                 |                                                                                                                                                                                                       |
|-----------------|-------------------------------------------------------------------------------------------------------------------------------------------------------------------------------------------------------|
| <b>Page S2:</b> | <b>S1: Table S1:</b> The complete response table for the four independent variables and their three levels. The efficiency is the output of 27 individual runs based on the Box-Behnken design (BBD). |
| <b>Page S6:</b> | <b>S2:</b> Details of optimization by implementing the response surface method (RSM) in Minitab17 based on the Box-Behnken Design (BBD).                                                              |
| <b>Page S7:</b> | <b>S3:</b> Prediction settings and results.                                                                                                                                                           |

S1:

**Table S1.** The complete response table for the four independent variables and their three levels. The efficiency is the output of 27 individual runs based on the Box-Behnken design (BBD).

| No                | IE<br>(%) | A     |       |       | B     |       |       | C     |        |       | D     |       |       |
|-------------------|-----------|-------|-------|-------|-------|-------|-------|-------|--------|-------|-------|-------|-------|
|                   |           | -1    | 0     | +1    | -1    | 0     | +1    | -1    | 0      | +1    | -1    | 0     | +1    |
| 1                 | 85.20     | 85.20 |       |       | 85.20 |       |       |       | 85.20  |       |       | 85.20 |       |
| 2                 | 77.99     | 77.99 |       |       |       |       | 77.99 |       | 77.99  |       |       | 77.99 |       |
| 3                 | 66.77     |       |       | 66.77 | 66.77 |       |       |       | 66.77  |       |       | 66.77 |       |
| 4                 | 69.87     |       |       | 69.87 |       |       | 69.87 |       | 69.87  |       |       | 69.87 |       |
| 5                 | 89.11     |       | 89.11 |       |       | 89.11 |       | 89.11 |        |       | 89.11 |       |       |
| 6                 | 92.06     |       | 92.06 |       |       | 92.06 |       | 92.06 |        |       |       |       | 92.06 |
| 7                 | 39.94     |       | 39.94 |       |       | 39.94 |       |       |        | 39.94 | 39.94 |       |       |
| 8                 | 37.86     |       | 37.86 |       |       | 37.86 |       |       |        | 37.86 |       |       | 37.86 |
| 9                 | 70.05     | 70.05 |       |       |       | 70.05 |       |       | 70.05  |       | 70.05 |       |       |
| 10                | 52.40     | 52.40 |       |       |       | 52.40 |       |       | 52.40  |       |       |       | 52.40 |
| 11                | 85.57     |       |       | 85.57 |       | 85.57 |       |       | 85.57  |       | 85.57 |       |       |
| 12                | 74.59     |       |       | 74.59 |       | 74.59 |       |       | 74.59  |       |       |       | 74.59 |
| 13                | 92.86     |       | 92.86 |       | 92.86 |       |       | 92.86 |        |       |       | 92.86 |       |
| 14                | 50.15     |       | 50.15 |       | 50.15 |       |       |       |        | 50.15 |       | 50.15 |       |
| 15                | 91.96     |       | 91.96 |       |       |       | 91.96 | 91.96 |        |       |       |       | 01.96 |
| 16                | 41.80     |       | 41.80 |       |       |       | 41.80 |       |        | 41.80 |       | 41.80 |       |
| 17                | 91.98     | 91.98 |       |       |       | 91.98 |       | 91.35 |        |       |       |       | 91.98 |
| 18                | 54.26     | 54.26 |       |       |       | 54.26 |       |       |        | 54.26 |       | 54.26 |       |
| 19                | 94.35     |       |       | 94.35 |       | 94.35 |       | 94.35 |        |       |       | 94.35 |       |
| 20                | 46.03     |       |       | 46.03 |       | 46.03 |       |       |        | 46.03 |       | 46.03 |       |
| 21                | 86.46     |       | 86.46 |       | 86.46 |       |       |       | 86.46  |       | 86.46 |       |       |
| 22                | 80.63     |       | 80.63 |       | 80.63 |       |       |       | 80.63  |       |       |       | 80.63 |
| 23                | 76.51     |       | 76.51 |       |       |       | 76.51 |       | 76.51  |       | 76.51 |       |       |
| 24                | 73.55     |       | 73.55 |       |       |       | 73.55 |       | 73.55  |       |       |       | 73.55 |
| 25                | 74.23     |       | 74.23 |       |       | 74.23 |       |       | 74.23  |       |       | 74.23 |       |
| 26                | 74.23     |       | 74.23 |       |       | 74.23 |       |       | 74.23  |       |       | 74.23 |       |
| 27                | 74.23     |       | 74.23 |       |       | 74.23 |       |       | 74.23  |       |       | 74.23 |       |
| Value             | 27        | 6     | 15    | 6     | 6     | 15    |       | 6     | 15     | 6     | 6     | 15    | 6     |
| Av.               | 72.02     | 71.98 | 71.70 | 72.86 | 77.01 | 70.06 |       | 92.05 | 74.82  | 45.01 | 74.61 | 72.39 | 68.52 |
| Effect = High-Low |           |       | 1.158 |       |       | 6.952 |       |       | 47.046 |       |       | 6.091 |       |

| No                | IE<br>(%) | AB    |       |       | AC    |       |       | AD    |       |       | BC    |       |       |
|-------------------|-----------|-------|-------|-------|-------|-------|-------|-------|-------|-------|-------|-------|-------|
|                   |           | -1    | 0     | +1    | -1    | 0     | +1    | -1    | 0     | +1    | -1    | 0     | +1    |
| 1                 | 85.20     |       |       | 85.20 |       | 85.20 |       |       | 85.20 |       |       | 85.20 |       |
| 2                 | 77.99     | 77.99 |       |       |       | 77.99 |       |       | 77.99 |       |       | 77.99 |       |
| 3                 | 66.77     | 66.77 |       |       |       | 66.77 |       |       | 66.77 |       |       | 66.77 |       |
| 4                 | 69.87     |       |       | 69.87 |       | 69.87 |       |       | 69.87 |       |       | 69.87 |       |
| 5                 | 89.11     |       | 89.11 |       |       | 89.11 |       |       | 89.11 |       |       | 89.11 |       |
| 6                 | 92.06     |       | 92.06 |       |       | 92.06 |       |       | 92.06 |       |       | 92.06 |       |
| 7                 | 39.94     |       | 39.94 |       |       | 39.94 |       |       | 39.94 |       |       | 39.94 |       |
| 8                 | 37.86     |       | 37.86 |       |       | 37.86 |       |       | 37.86 |       |       | 37.86 |       |
| 9                 | 70.05     |       | 70.05 |       |       | 70.05 |       |       |       | 70.05 |       | 70.05 |       |
| 10                | 52.40     |       | 52.40 |       |       | 52.40 |       | 52.40 |       |       |       | 52.40 |       |
| 11                | 85.57     |       | 85.57 |       |       | 85.57 |       | 85.57 |       |       |       | 85.57 |       |
| 12                | 74.59     |       | 74.59 |       |       | 74.59 |       |       |       | 74.59 |       | 74.59 |       |
| 13                | 92.86     |       | 92.86 |       |       | 92.86 |       |       | 92.86 |       |       |       | 92.86 |
| 14                | 50.15     |       | 50.15 |       |       | 50.15 |       |       | 50.15 |       | 50.15 |       |       |
| 15                | 91.96     |       | 91.96 |       |       | 91.96 |       |       | 91.96 |       | 91.96 |       |       |
| 16                | 41.80     |       | 41.80 |       |       | 41.80 |       |       | 41.80 |       |       |       | 41.80 |
| 17                | 91.98     |       | 91.98 |       |       |       | 91.98 |       | 91.98 |       |       | 91.98 |       |
| 18                | 54.26     |       | 54.26 |       | 54.26 |       |       |       | 54.26 |       |       | 54.26 |       |
| 19                | 94.35     |       | 94.35 |       | 94.35 |       |       |       | 94.35 |       |       | 94.35 |       |
| 20                | 46.03     |       | 46.03 |       |       |       | 46.03 |       | 46.03 |       |       | 46.03 |       |
| 21                | 86.46     |       | 86.46 |       |       | 86.46 |       |       | 86.46 |       |       | 86.46 |       |
| 22                | 80.63     |       | 80.63 |       |       | 80.63 |       |       | 80.63 |       |       | 80.63 |       |
| 23                | 76.51     |       | 76.51 |       |       | 76.51 |       |       | 76.51 |       |       | 76.51 |       |
| 24                | 73.55     |       | 73.55 |       |       | 73.55 |       |       | 73.55 |       |       | 73.55 |       |
| 25                | 74.23     |       | 74.23 |       |       | 74.23 |       |       | 74.23 |       |       | 74.23 |       |
| 26                | 74.23     |       | 74.23 |       |       | 74.23 |       |       | 74.23 |       |       | 74.23 |       |
| 27                | 74.23     |       | 74.23 |       |       | 74.23 |       |       | 74.23 |       |       | 74.23 |       |
| Value             | 27        | 2     | 23    | 2     | 2     | 23    | 2     | 2     | 23    | 2     | 2     | 23    | 2     |
| Av.               | 72.02     | 72.38 | 71.51 | 77.54 | 74.31 | 72.09 | 69.01 | 68.99 | 72.26 | 72.32 | 71.06 | 72.52 | 67.33 |
| Effect = High-Low |           |       | 6.021 |       |       | 5.300 |       |       | 3.335 |       |       | 5.186 |       |

| No                | IE<br>(%) | BD    |       |       | CD    |       |       | ABC |       |    | ABD |       |    |
|-------------------|-----------|-------|-------|-------|-------|-------|-------|-----|-------|----|-----|-------|----|
|                   |           | -1    | 0     | +1    | -1    | 0     | +1    | -1  | 0     | +1 | -1  | 0     | +1 |
| 1                 | 85.20     |       | 85.20 |       |       | 85.20 |       |     | 85.20 |    |     | 85.20 |    |
| 2                 | 77.99     |       | 77.99 |       |       | 77.99 |       |     | 77.99 |    |     | 77.99 |    |
| 3                 | 66.77     |       | 66.77 |       |       | 66.77 |       |     | 66.77 |    |     | 66.77 |    |
| 4                 | 69.87     |       | 69.87 |       |       | 69.87 |       |     | 69.87 |    |     | 69.87 |    |
| 5                 | 89.11     |       | 89.11 |       |       |       | 89.11 |     | 89.11 |    |     | 89.11 |    |
| 6                 | 92.06     |       | 92.06 |       | 92.06 |       |       |     | 92.06 |    |     | 92.06 |    |
| 7                 | 39.94     |       | 39.94 |       | 39.94 |       |       |     | 39.94 |    |     | 39.94 |    |
| 8                 | 37.86     |       | 37.86 |       |       |       | 37.86 |     | 37.86 |    |     | 37.86 |    |
| 9                 | 70.05     |       | 70.05 |       |       | 70.05 |       |     | 70.05 |    |     | 70.05 |    |
| 10                | 52.40     |       | 52.40 |       |       | 52.40 |       |     | 52.40 |    |     | 52.40 |    |
| 11                | 85.57     |       | 85.57 |       |       | 85.57 |       |     | 85.57 |    |     | 85.57 |    |
| 12                | 74.59     |       | 74.59 |       |       | 74.59 |       |     | 74.59 |    |     | 74.59 |    |
| 13                | 92.86     |       | 92.86 |       |       | 92.86 |       |     | 92.86 |    |     | 92.86 |    |
| 14                | 50.15     |       | 50.15 |       |       | 50.15 |       |     | 50.15 |    |     | 50.15 |    |
| 15                | 91.96     |       | 91.96 |       |       | 91.96 |       |     | 91.96 |    |     | 91.96 |    |
| 16                | 41.80     |       | 41.80 |       |       | 41.80 |       |     | 41.80 |    |     | 41.80 |    |
| 17                | 91.98     |       | 91.98 |       |       | 91.98 |       |     | 91.98 |    |     | 91.98 |    |
| 18                | 54.26     |       | 54.26 |       |       | 54.26 |       |     | 54.26 |    |     | 54.26 |    |
| 19                | 94.35     |       | 94.35 |       |       | 94.35 |       |     | 94.35 |    |     | 94.35 |    |
| 20                | 46.03     |       | 46.03 |       |       | 46.03 |       |     | 46.03 |    |     | 46.03 |    |
| 21                | 86.46     |       |       | 86.46 |       | 86.46 |       |     | 86.46 |    |     | 86.46 |    |
| 22                | 80.63     | 80.63 |       |       |       | 80.63 |       |     | 80.63 |    |     | 80.63 |    |
| 23                | 76.51     | 76.51 |       |       |       | 76.51 |       |     | 76.51 |    |     | 76.51 |    |
| 24                | 73.55     |       |       | 73.55 |       | 73.55 |       |     | 73.55 |    |     | 73.55 |    |
| 25                | 74.23     |       | 74.23 |       |       | 74.23 |       |     | 74.23 |    |     | 74.23 |    |
| 26                | 74.23     |       | 74.23 |       |       | 74.23 |       |     | 74.23 |    |     | 74.23 |    |
| 27                | 74.23     |       | 74.23 |       |       | 74.23 |       |     | 74.23 |    |     | 74.23 |    |
| Value             | 27        | 2     | 23    | 2     | 2     | 23    | 2     | 0   | 27    | 0  | 0   | 27    | 0  |
| Av.               | 72.02     | 78.57 | 70.76 | 80.01 | 66.00 | 73.29 | 63.49 |     | 72.02 |    |     | 72.02 |    |
| Effect = High-Low |           |       | 9.244 |       |       | 9.805 |       |     |       |    |     |       |    |

| No                | IE<br>(%) | ACD |       |    | CBD |       |    | ABCD |       |    |
|-------------------|-----------|-----|-------|----|-----|-------|----|------|-------|----|
|                   |           | -1  | 0     | +1 | -1  | 0     | +1 | -1   | 0     | +1 |
| 1                 | 85.20     |     | 85.20 |    |     | 85.20 |    |      | 85.20 |    |
| 2                 | 77.99     |     | 77.99 |    |     | 77.99 |    |      | 77.99 |    |
| 3                 | 66.77     |     | 66.77 |    |     | 66.77 |    |      | 66.77 |    |
| 4                 | 69.87     |     | 69.87 |    |     | 69.87 |    |      | 69.87 |    |
| 5                 | 89.11     |     | 89.11 |    |     | 89.11 |    |      | 89.11 |    |
| 6                 | 92.06     |     | 92.06 |    |     | 92.06 |    |      | 92.06 |    |
| 7                 | 39.94     |     | 39.94 |    |     | 39.94 |    |      | 39.94 |    |
| 8                 | 37.86     |     | 37.86 |    |     | 37.86 |    |      | 37.86 |    |
| 9                 | 70.05     |     | 70.05 |    |     | 70.05 |    |      | 70.05 |    |
| 10                | 52.40     |     | 52.40 |    |     | 52.40 |    |      | 52.40 |    |
| 11                | 85.57     |     | 85.57 |    |     | 85.57 |    |      | 85.57 |    |
| 12                | 74.59     |     | 74.59 |    |     | 74.59 |    |      | 74.59 |    |
| 13                | 92.86     |     | 92.86 |    |     | 92.86 |    |      | 92.86 |    |
| 14                | 50.15     |     | 50.15 |    |     | 50.15 |    |      | 50.15 |    |
| 15                | 91.96     |     | 91.96 |    |     | 91.96 |    |      | 91.96 |    |
| 16                | 41.80     |     | 41.80 |    |     | 41.80 |    |      | 41.80 |    |
| 17                | 91.98     |     | 91.98 |    |     | 91.98 |    |      | 91.98 |    |
| 18                | 54.26     |     | 54.26 |    |     | 54.26 |    |      | 54.26 |    |
| 19                | 94.35     |     | 94.35 |    |     | 94.35 |    |      | 94.35 |    |
| 20                | 46.03     |     | 46.03 |    |     | 46.03 |    |      | 46.03 |    |
| 21                | 86.46     |     | 86.46 |    |     | 86.46 |    |      | 86.46 |    |
| 22                | 80.63     |     | 80.63 |    |     | 80.63 |    |      | 80.63 |    |
| 23                | 76.51     |     | 76.51 |    |     | 76.51 |    |      | 76.51 |    |
| 24                | 73.55     |     | 73.55 |    |     | 73.55 |    |      | 73.55 |    |
| 25                | 74.23     |     | 74.23 |    |     | 74.23 |    |      | 74.23 |    |
| 26                | 74.23     |     | 74.23 |    |     | 74.23 |    |      | 74.23 |    |
| 27                | 74.23     |     | 74.23 |    |     | 74.23 |    |      | 74.23 |    |
| Valu<br>e         | 27        | 0   | 27    | 0  | 0   | 27    | 0  | 0    | 27    | 0  |
| Av.               | 72.02     |     | 72.02 |    |     | 72.02 |    |      | 72.02 |    |
| Effect = High-Low |           |     |       |    |     |       |    |      |       |    |

## S2: Details of optimization by implementing the response surface method (RSM) in Minitab17 based on the Box-Behnken Design (BBD)

### Box-Behnken Design

Factors: 4 Replicates: 1  
Base runs: 27 Total runs: 27  
Base blocks: 1 Total blocks: 1

Center points: 3

### Response Surface Regression: Eff.% versus A, B, C, D

#### Analysis of Variance

| Source            | DF | Adj SS  | Adj MS  | F-Value | P-Value |
|-------------------|----|---------|---------|---------|---------|
| Model             | 14 | 7264.74 | 518.91  | 7.10    | 0.001   |
| Linear            | 4  | 6830.80 | 1707.70 | 23.37   | 0.000   |
| A                 | 1  | 2.34    | 2.34    | 0.03    | 0.861   |
| B                 | 1  | 76.96   | 76.96   | 1.05    | 0.325   |
| C                 | 1  | 6640.17 | 6640.17 | 90.89   | 0.000   |
| D                 | 1  | 111.33  | 111.33  | 1.52    | 0.241   |
| Square            | 4  | 345.89  | 86.47   | 1.18    | 0.367   |
| A*A               | 1  | 0.28    | 0.28    | 0.00    | 0.951   |
| B*B               | 1  | 43.50   | 43.50   | 0.60    | 0.455   |
| C*C               | 1  | 196.37  | 196.37  | 2.69    | 0.127   |
| D*D               | 1  | 12.35   | 12.35   | 0.17    | 0.688   |
| 2-Way Interaction | 6  | 88.05   | 14.67   | 0.20    | 0.970   |
| A*B               | 1  | 26.57   | 26.57   | 0.36    | 0.558   |
| A*C               | 1  | 28.09   | 28.09   | 0.38    | 0.547   |
| A*D               | 1  | 11.12   | 11.12   | 0.15    | 0.703   |
| B*C               | 1  | 13.88   | 13.88   | 0.19    | 0.671   |
| B*D               | 1  | 2.06    | 2.06    | 0.03    | 0.869   |
| C*D               | 1  | 6.33    | 6.33    | 0.09    | 0.774   |
| Error             | 12 | 876.72  | 73.06   |         |         |
| Lack-of-Fit       | 10 | 876.72  | 87.67   | *       | *       |
| Pure Error        | 2  | 0.00    | 0.00    |         |         |
| Total             | 26 | 8141.45 |         |         |         |

#### Model Summary

S R-sq  
8.54750 89.23%

The above analysis is used to determine the acceptance of the selected method for the factor optimization. The square regression coefficient R-sq indicates the acceptance of the RSM and yields 89.2%, which turns out to be a good choice.

To determine the coefficient values of the second-order model according to Eq. 4, in Minitab 17 the following step was implemented and thereafter applied the values in the Eq. 4 as described below:

### S3: Coded Coefficients

| Term     | Coef   | SE Coef | T-Value | P-Value | VIF  |
|----------|--------|---------|---------|---------|------|
| Constant | 74.23  | 4.93    | 15.04   | 0.000   |      |
| A        | 0.44   | 2.47    | 0.18    | 0.861   | 1.00 |
| B        | -2.53  | 2.47    | -1.03   | 0.325   | 1.00 |
| C        | -23.52 | 2.47    | -9.53   | 0.000   | 1.00 |
| D        | -3.05  | 2.47    | -1.23   | 0.241   | 1.00 |
| A*A      | -0.23  | 3.70    | -0.06   | 0.951   | 1.25 |
| B*B      | 2.86   | 3.70    | 0.77    | 0.455   | 1.25 |
| C*C      | -6.07  | 3.70    | -1.64   | 0.127   | 1.25 |
| D*D      | -1.52  | 3.70    | -0.41   | 0.688   | 1.25 |
| A*B      | 2.58   | 4.27    | 0.60    | 0.558   | 1.00 |
| A*C      | -2.65  | 4.27    | -0.62   | 0.547   | 1.00 |
| A*D      | 1.67   | 4.27    | 0.39    | 0.703   | 1.00 |
| B*C      | -1.86  | 4.27    | -0.44   | 0.671   | 1.00 |
| B*D      | 0.72   | 4.27    | 0.17    | 0.869   | 1.00 |
| C*D      | -1.26  | 4.27    | -0.29   | 0.774   | 1.00 |

Regression Equation in uncoded units

$$\begin{aligned}\text{Eff.}\% = & 74.23 + 0.44 A - 2.53 B - 23.52 C - 3.05 D - 0.23 A*A + 2.86 B*B \\ & - 6.07 C*C - 1.52 D*D + 2.58 A*B - 2.65 A*C + 1.67 A*D - 1.86 B*C \\ & + 0.72 B*D - 1.26 C*D\end{aligned}$$

The above equation is used to predict the optimal efficiency that can be achieved by choosing the best level for each variable.
